# Supplementary material for: A reanalysis of nanoparticle tumor delivery using classical pharmacokinetic metrics
Source: PubMed Central journal article supplement — Sci Adv. 2020 Jul 15;6(29):eaay9249. doi: 10.1126/sciadv.aay9249 (PMC7439617; doi:10.1126/sciadv.aay9249), 2020-07-15
Supplement: aay9249_SM.pdf [file aay9249_SM.pdf]

## Supplementary Materials for

### **A reanalysis of nanoparticle tumor delivery using classical pharmacokinetic metrics**

Lauren S. L. Price, Stephan T. Stern, Allison M. Deal, Alexander V. Kabanov, William C. Zamboni\*

\*Corresponding author. Email: [zamboni@email.unc.edu](mailto:zamboni@email.unc.edu)

Published 15 July 2020, *Sci. Adv.* **6**, eaay9249 (2020)  
DOI: [10.1126/sciadv.aay9249](https://doi.org/10.1126/sciadv.aay9249)

#### **This PDF file includes:**

Tables S1 and S2

## Supplementary Materials

### Supplementary Tables – Statistical Analysis Results

| <b>Table S1.</b> Spearman Correlation Coefficients ( $\rho$ ) for Relationships between %ID in Tumor (per Wilhelm et al.) and Other Pharmacokinetic Metrics |                             |                                     |                      |                 |
|-------------------------------------------------------------------------------------------------------------------------------------------------------------|-----------------------------|-------------------------------------|----------------------|-----------------|
| %ID in Tumor vs                                                                                                                                             |                             | $AUC_{tumor}/AUC_{blood}$ ratio (%) | RDI-OT $AUC_{tumor}$ | tumor $C_{max}$ |
| All Data Sets                                                                                                                                               | <b>All Subsets Combined</b> | 0.183                               | 0.319                | 0.562           |
|                                                                                                                                                             | -Liposome Subset            | 0.145                               | 0.150                | 0.412           |
|                                                                                                                                                             | -Polymeric Subset           | 0.094                               | 0.422                | 0.547           |
|                                                                                                                                                             | -Inorganic Subset           | 0.265                               | 0.322                | 0.618           |
| Excluding Outliers                                                                                                                                          | <b>All Subsets Combined</b> | 0.151                               | 0.289                | 0.572           |
|                                                                                                                                                             | -Liposome Subset            | 0.023                               | 0.029                | 0.514           |
|                                                                                                                                                             | -Polymeric Subset           | 0.097                               | 0.447                | 0.519           |
|                                                                                                                                                             | -Inorganic Subset           | 0.243                               | No outliers          | 0.605           |
| -No Relationship = RED; Weak Relationship = ORANGE; Moderate Relationship = YELLOW; Strong Relationship = GREEN.                                            |                             |                                     |                      |                 |

| <b>Table S2.</b> Pearson Correlation Coefficients ( $r$ ) for Relationships between %ID in Tumor (per Wilhelm et al.) and Other Pharmacokinetic Metrics |                             |                                     |                      |                 |
|---------------------------------------------------------------------------------------------------------------------------------------------------------|-----------------------------|-------------------------------------|----------------------|-----------------|
| %ID in Tumor vs                                                                                                                                         |                             | $AUC_{tumor}/AUC_{blood}$ ratio (%) | RDI-OT $AUC_{tumor}$ | tumor $C_{max}$ |
| All Data Sets                                                                                                                                           | <b>All Subsets Combined</b> | 0.254                               | 0.590                | 0.266           |
|                                                                                                                                                         | -Liposome Subset            | 0.906                               | 0.915                | 0.0005          |
|                                                                                                                                                         | -Polymeric Subset           | 0.00003                             | 0.501                | 0.502           |
|                                                                                                                                                         | -Inorganic Subset           | 0.092                               | 0.246                | 0.457           |
| Excluding Outliers                                                                                                                                      | <b>All Subsets Combined</b> | 0.007                               | 0.232                | 0.285           |
|                                                                                                                                                         | -Liposome Subset            | -0.085                              | -0.075               | 0.489           |
|                                                                                                                                                         | -Polymeric Subset           | 0.019                               | 0.576                | 0.146           |
|                                                                                                                                                         | -Inorganic Subset           | 0.053                               | No outliers          | 0.445           |
| -No Relationship = RED; Weak Relationship = ORANGE; Moderate Relationship = YELLOW; Strong Relationship = GREEN.                                        |                             |                                     |                      |                 |
